# Supplementary material
Source: publisher figshare collection journal article supplement (https://geolsoc.figshare.com/ndownloader/files/5423201)
Supplement: Supplementary file 1 [file 5423201]

Appendix 1. Data on Granitic Tin Deposits ,,,,,,,,,,,,,,,,,,,
Deposit ,Province,Country,Age Used,Age as given,Tonnage,Grade,Sn ,Reference,,,,,,,,,,,
,,,Ma,,Mt,% Sn,Mt,,,,,,,,,,,,
Maghn,,Afghanistan,29,Oligocene,,,,http://apps1.gdr.nrcan.gc.ca/gsc_minerals/gquerycache/snw/DP/dp4.html,,,,,,,,,,,
Misgaran,Heart,Afghanistan,29,Oligocene,,,,http://apps1.gdr.nrcan.gc.ca/gsc_minerals/gquerycache/snw/DP/dp5.html,,,,,,,,,,,
Taghawlor,Oruzgan,Afghanistan,29,Oligocene,,,0.0176,http://apps1.gdr.nrcan.gc.ca/gsc_minerals/gquerycache/snw/DP/dp1029.html,,,,,,,,,,,
Tourmaline,,Afghanistan,29,Oligocene,,,,http://apps1.gdr.nrcan.gc.ca/gsc_minerals/gquerycache/snw/DP/dp7.html,,,,,,,,,,,
Pinguino,,Argentina,170,middle Jurassic,,,,"Jovic et al., 2011, Canadian Mineral, v. 49, p. 931-946",,,,,,,,,,,
Pircas,Jujuy,Argentina,,,,,,http://apps1.gdr.nrcan.gc.ca/gsc_minerals/gquerycache/snw/DP/dp25.html,,,,,,,,,,,
Pirquitas,Jujuy,Argentina,,,0.073,3.26,0.002,http://apps1.gdr.nrcan.gc.ca/gsc_minerals/gquerycache/snw/DP/dp23.html,,,,,,,,,,,
San Rafael,San Juan,Argentina,,,,,,http://apps1.gdr.nrcan.gc.ca/gsc_minerals/gquerycache/snw/DP/dp12.html,,,,,,,,,,,
Vil Achay,Catamarca,Argentina,,,0.116,1,0.001,http://apps1.gdr.nrcan.gc.ca/gsc_minerals/gquerycache/snw/DP/dp27.html,,,,,,,,,,,
Yolanda,San Luis,Argentina,,,0.0675,1.5,0.001,http://apps1.gdr.nrcan.gc.ca/gsc_minerals/gquerycache/snw/DP/dp28.html,,,,,,,,,,,
Aberfoyle,Tasmania,Australia,350,Devonian-Early Carboniferous,2.1,0.91,0.019,Tasmanian Geol Survey Bull 72,,,,,,,,,,,
Anchor,Tasmania,Australia,350,Devonian-Early Carboniferous,2.39,0.28,0.007,Tasmanian Geol Survey Bull 72,,,,,,,,,,,
Ardlethan,New South Wales,Australia,410,Upper Devonian,9,0.5,0.045,"Ren et al., 1995, Econ Geol, v. 90, p. 1620",,,,,,,,,,,
Baal Gammon,Queensland,Australia,,,3,0.3,0.009,"Eckstrand et al., 1995, Geology of Canadian Mineral Deposit Types: Geol Survey of Canada",,,,,,,,,,,
Breakfast Mine,NSW - Mole Granite,Australia,244,,,,,"Schaltegger et al., 2005, Chemical Geology, v. 220, p. 215-235",,,,,,,,,,,
Cannibal Creek,Queensland,Australia,265,Upper Permian,1.5,0.1,0.002,"Taylor, 1979, Geol of Tin Deps, p. 245",,,,,,,,,,,
Chillagoe,Queensland,Australia,315,,,,0.366,"Lehrmann et al., 2009, SGA Townsville",,,,,,,,,,,
China Camp,Queensland,Australia,265,Upper Permian,0.3,0.03,0.000090,"Taylor, 1979, Geol of Tin Deps, p. 245",,,,,,,,,,,
Cleveland,Tasmania,Australia,350,Devonian-Early Carboniferous,12.4,0.61,0.076,"Collins, 1981, Econ Geol, v. 76, p. 365-392",,,,,,,,,,,
Dalys Face,Queensland,Australia,265,Upper Permian,0.2,0.03,0.000060,"Taylor, 1979, Geol of Tin Deps, p. 245",,,,,,,,,,,
Doradilla,New South Wales,Australia,410,Upper Devonian,11,0.3,0.033,"Blevin and Chappel, 1995, Econ Geol, v 90, p. 1604",,,,,,,,,,,
"Emford, Herberton",Queensland,Australia,265,Upper Permian,,,,"Taylor, 1979, Geol of Tin Deps, p. 245",,,,,,,,,,,
Federation,Tasmania,Australia,350,Devonian-Early Carboniferous,,,,Tasmanian Geol Survey Bull 72,,,,,,,,,,,
"Gillian,Mt. Garnet, Herberton",Queensland,Australia,265,Upper Permian,1.5,0.6,0.009,"Taylor, 1979,  Geol of Tin Deps, p. 245",,,,,,,,,,,
Greenbushes,Western Australia,Australia,,,28,0.11,0.031,"Premoli, 1985, Natural Resources Forum, v. 9, p. 107-117",,,,,,,,,,,
Lakeside,Tasmania,Australia,350,Devonian-Early Carboniferous,0.75,0.2,0.002,Tasmanian Geol Survey Bull 72,,,,,,,,,,,
Lottah,Tasmania,Australia,350,,,,,"Blevin and Chappel, 1995, Econ Geol, v 90, p. 1604",,,,,,,,,,,
Moina,Tasmania,Australia,350,Devonian-Early Carboniferous,26,0.1,0.026,Tasmanian Geol Survey Bull 72,,,,,,,,,,,
Mt Bischoff,Tasmania,Australia,353,Devonian-Early Carboniferous,10.54,1.1,0.116,"Halley and Walshe, 1995, Econ Geol, v 90, p. 1965",,,,,,,,,,,
Mt Lindsay,Tasmania,Australia,350,Devonian-Early Carboniferous,36,0.2,0.072,http://www.ventureminerals.com.au/documents/VMS0215Majortin-tungstenResourceUpgrade-MtLindsayProject.pdf,,,,,,,,,,,
Paradise Lode,NSW - Mole Granite,Australia,244,,,,,"Schaltegger et al., 2005, Chemical Geology, v. 220, p. 215-235",,,,,,,,,,,
Pieman (E Renison),Tasmania,Australia,350,Devonian-Early Carboniferous,0.43,1,0.004,Tasmanian Geol Survey Bull 72,,,,,,,,,,,
"Pinnacles,Herberton",Queensland,Australia,265,Upper Permian,4,0.3,0.012,"Taylor, 1979, Geol of Tin Deps, p. 245",,,,,,,,,,,
Pyramid,Tasmania,Australia,350,,3,0.33,0.010,"Blevin and Chappel, 1995, Econ Geol, v 90, p. 1604",,,,,,,,,,,
Queen Hill (Zeehan),Tasmania,Australia,350,Devonian-Early Carboniferous,3.6,1.2,0.043,Tasmanian Geol Survey Bull 72,,,,,,,,,,,
Razorback,Tasmania,Australia,350,Devonian-Early Carboniferous,0.34,0.9,0.003,Tasmanian Geol Survey Bull 72,,,,,,,,,,,
Renison Bell,Tasmania,Australia,350,Devonian-Early Carboniferous,24.54,1.41,0.346,Tasmanian Geol Survey Bull 72,,,,,,,,,,,
Salmons Vein (E Renison),Tasmania,Australia,350,Devonian-Early Carboniferous,0.83,0.19,0.002,Tasmanian Geol Survey Bull 72,,,,,,,,,,,
St. Dizier,Tasmania,Australia,350,Devonian-Early Carboniferous,2.6,0.5,0.013,Tasmanian Geol Survey Bull 72,,,,,,,,,,,
Storys Creek,Tasmania,Australia,350,Devonian-Early Carboniferous,1.1,0.18,0.002,Tasmanian Geol Survey Bull 72,,,,,,,,,,,
Sweenys,Tasmania,Australia,350,Devonian-Early Carboniferous,,,,Tasmanian Geol Survey Bull 72,,,,,,,,,,,
Taronga,New South Wales,Australia,410,,37,0.15,0.056,"Premoli, 1985, Natural Resources Forum, v. 9, p. 107-117",,,,,,,,,,,
Walwa,New South Wales,Australia,410,Upper Devonian,1,0.15,0.002,"Blevin and Chappel, 1995, Econ Geol, v 90, p. 1604",,,,,,,,,,,
Yankee Lode,NSW - Mole Granite,Australia,244,,,,,"Schaltegger et al., 2005, Chemical Geology, v. 220, p. 215-235",,,,,,,,,,,
Zeehan,Tasmania,Australia,,,7.3,0.7,0.051,"Blevin and Chappel, 1995, Econ Geol, v 90, p. 1604",,,,,,,,,,,
Aceromarca,,Bolivia,210,,,,,"Kelly and Turneaure, 1970, Econ Geol, v 65, p 609; McBride et al., 1983, Geol Rundschau, v 72, p. 685",,,,,,,,,,,
Araca,,Bolivia,25,,,,,"Kelly and Turneaure, 1970, Econ Geol, v 65, p 609; McBride et al., 1983, Geol Rundschau, v 72, p. 685",,,,,,,,,,,
Avicaya,,Bolivia,20.5,,,,,"Ishihara et al., 2011, Resource Geology, v. 61, p. 174-191",,,,,,,,,,,
Bajaderia,,Bolivia,25,,,,,"Turneaure and Welker, 1947, Econ Geol, v 42, p 595-625",,,,,,,,,,,
Barrascota (Poldi),,Bolivia,25,,,,,"Turneaure and Welker, 1947, Econ Geol, v 42, p 595-625; McBride et al., 1983, Geol Rundschau, v 72, p. 685",,,,,,,,,,,
Bengala,,Bolivia,24,,,,,"Turneaure and Welker, 1947, Econ Geol, v 42, p 595-625; McBride et al., 1983, Geol Rundschau, v 72, p. 685",,,,,,,,,,,
Blanca (Victoria),,Bolivia,24,,,,,"Turneaure and Welker, 1947, Econ Geol, v 42, p 595; McBride et al., 1983, Geol Rundschau, v 72, p 685",,,,,,,,,,,
Bolivar,,Bolivia,,,1.88,1.35,0.025,"Ishihara et al., 2011, Resource Geology, v. 61, p. 174-191; http://apps1.gdr.nrcan.gc.ca/gsc_minerals/gquerycache/snw/DP/dp133.html",,,,,,,,,,,
Bolsa Negra,,Bolivia,23,,,,,"Kelly and Turneaure, 1970, Econ Geol, v 65, p 609",,,,,,,,,,,
"Caracoles (Enrique, Bricker, Recompensa)",,Bolivia,23,,7.75,1.29,0.100,"Rivas, 1979, Geol Soc Malaysia Bull 11, p. 169: USGS Bull 1975; http://apps1.gdr.nrcan.gc.ca/gsc_minerals/gquerycache/snw/DP/dp155.html",,,,,,,,,,,
Carguaicollo,,Bolivia,,,,,,"Ishihara et al., 2011, Resource Geology, v. 61, p. 174-191",,,,,,,,,,,
Carmen (Miluni),,Bolivia,210,,,,,"Kelly and Turneaure, 1970, Econ Geol, v 65, p 609; McBride et al., 1983, Geol Rundschau, v 72, p. 685",,,,,,,,,,,
Catavi-Siglo XX (Llallagua),,Bolivia,23.4,,42,0.22,0.092,"Premoli, 1985, Natural Resources Forum, v. 9, p. 107-117",,,,,,,,,,,
Cerro Negro,,Bolivia,,,,,,"Kelly and Turneaure, 1970, Econ Geol, v 65, p 609",,,,,,,,,,,
"Chacaltaya (Salvador, Kelluani, Kalauyu)",,Bolivia,210,,9,0.5,0.045,"McBride et al., 1983, Geologische Rundschau, v. 72, p. 685-713",,,,,,,,,,,
Chocaya,,Bolivia,13.8,,0.807531381,,,"Grant et al., 1979, Econ Geol, v. 74, p. 838-851",,,,,,,,,,,
Chojila,,Bolivia,203,,8,0.4,0.032,"Lehmann, 1990, Metallogeny of tin; Eckstrand et al., 1995, Geol Can Ore Deps",,,,,,,,,,,
Chorloque,,Bolivia,16,,1.89,1,0.019,"Grant et al., 1979, Econ Geol, v. 74, p. 838-851; http://apps1.gdr.nrcan.gc.ca/gsc_minerals/gquerycache/snw/DP/dp150.html",,,,,,,,,,,
Colavi-Canutillo,,Bolivia,,,16,0.45,0.072,"Premoli, 1985, Natural Resources Forum, v. 9, p. 107-117",,,,,,,,,,,
Colquechaca,,Bolivia,22.6,,,,,"Grant et al., 1979, Econ Geol, v. 74, p. 838-851",,,,,,,,,,,
Colquiri,,Bolivia,23,,30,0.8,0.240,"Ishihara et al., 2011, Resource Geology, v. 61, p. 174-191; http://apps1.gdr.nrcan.gc.ca/gsc_minerals/gquerycache/snw/DP/dp158.html",,,,,,,,,,,
Copacabana,,Bolivia,25,,,,,"Turneaure and Welker, 1947, Econ Geol, v 42, p 595-625",,,,,,,,,,,
"Cotacucho (Victoria, Blanca)",,Bolivia,25,,,,,"Turneaure and Welker, 1947, Econ Geol, v 42, p 595-625",,,,,,,,,,,
Coya (Concordia),,Bolivia,25,,,,,"Kelly and Turneaure, 1970, Econ Geol, v 65, p 609",,,,,,,,,,,
El Salvador,,Bolivia,25,,,,,"Kelly and Turneaure, 1970, Econ Geol, v 65, p 609",,,,,,,,,,,
Esmerald (Andes),,Bolivia,211,,,,,"Kelly and Turneaure, 1970, Econ Geol, v 65, p 609",,,,,,,,,,,
Estrella (Gigante),,Bolivia,24,,,,,"Turneaure and Welker, 1947, Econ Geol, v 42, p 595-625; McBride et al., 1983, Geol Rundschau, v 72, p. 685",,,,,,,,,,,
Fabulosa,,Bolivia,210,,,,,"Kelly and Turneaure, 1970, Econ Geol, v 65, p 609",,,,,,,,,,,
Florencia  (San Florencio),,Bolivia,24,,15,0.9,0.135,"Turneaure and Welker, 1947, Econ Geol, v 42, p 595-625; Premoli, 1985, Natural Resources Forum, v. 9, p. 107-117",,,,,,,,,,,
Huallatani,,Bolivia,,,0.833,0.6,0.005,http://apps1.gdr.nrcan.gc.ca/gsc_minerals/gquerycache/snw/DP/dp126.html,,,,,,,,,,,
Huanuni,,Bolivia,25,,9,3.5,0.315,"Lehmann, 1990, Metallogeny of tin; http://apps1.gdr.nrcan.gc.ca/gsc_minerals/gquerycache/snw/DP/dp135.html",,,,,,,,,,,
Huari Huari,,Bolivia,20,,,,,"Kelly and Turneaure, 1970, Econ Geol, v 65, p 609",,,,,,,,,,,
Illimani,,Bolivia,,,,,,"Grant et al., 1979, Econ Geol, v. 74, p. 838-851",,,,,,,,,,,
Japo,,Bolivia,,,25,0.35,0.088,"Premoli, 1985, Natural Resources Forum, v. 9, p. 107-117",,,,,,,,,,,
Juanita,,Bolivia,25,,,,,"Turneaure and Welker, 1947, Econ Geol, v 42, p 595-625",,,,,,,,,,,
Kari Kari,,Bolivia,21.4,,,,,"Kelly and Turneaure, 1970, Econ Geol, v 65, p 609",,,,,,,,,,,
Kellhuani-Kaluyo,,Bolivia,,,3.723,0.6,0.022,http://apps1.gdr.nrcan.gc.ca/gsc_minerals/gquerycache/snw/DP/dp127.html,,,,,,,,,,,
Laramcota,,Bolivia,25,,,,,"Kelly and Turneaure, 1970, Econ Geol, v 65, p 609",,,,,,,,,,,
Maragua,,Bolivia,25,,,,,"Kelly and Turneaure, 1970, Econ Geol, v 65, p 609",,,,,,,,,,,
Maria-Teresa,,Bolivia,,,0.11,1.24,0.001,http://apps1.gdr.nrcan.gc.ca/gsc_minerals/gquerycache/snw/DP/dp1010.html,,,,,,,,,,,
Marta,,Bolivia,24,,,,,"Turneaure and Welker, 1947, Econ Geol, v 42, p 595-625; McBride et al., 1983, Geol Rundschau, v 72, p. 685",,,,,,,,,,,
Milluni,,Bolivia,210,,,,,"Kelly and Turneaure, 1970, Econ Geol, v 65, p 609",,,,,,,,,,,
Monte Blanco,,Bolivia,24,,,,,"Turneaure and Welker, 1947, Econ Geol, v 42, p 595-625; McBride et al., 1983, Geol Rundschau, v 72, p. 685",,,,,,,,,,,
Morococala,,Bolivia,20,,,,,"Kelly and Turneaure, 1970, Econ Geol, v 65, p 609: Sugaki et al., 2003, Resource Geology, v. 53, p. 273",,,,,,,,,,,
Oruro,,Bolivia,16.3,,100,0.2,0.200,"McBride et al., 1983, Geologische Rundschau, v. 72, p. 685-713",,,,,,,,,,,
"Pongo (Alasca, Valenciana, Santa Elena, Choquetanga)",,Bolivia,210,,,,,"Kelly and Turneaure, 1970, Econ Geol, v 65, p 609",,,,,,,,,,,
Pongo-Rinconada ,,Bolivia,210,,,,,"Turneaure and Welker, 1947, Econ Geol, v 42, p 595-625; McBride et al., 1983, Geol Rundschau, v 72, p. 685",,,,,,,,,,,
Poopa,,Bolivia,25,,,,,"Kelly and Turneaure, 1970, Econ Geol, v 65, p 609",,,,,,,,,,,
Porco/Pucro??,,Bolivia,8.6,,,,,"Cunningham et al., 1994, v. 89, p. 1833-1841",,,,,,,,,,,
Potosi (Cerro Rico),,Bolivia,14,,828,0.35,2.898,"Grant et al., 1979, Econ Geol, v. 74, p. 838-851; http://apps1.gdr.nrcan.gc.ca/gsc_minerals/gquerycache/snw/DP/dp147.html",,,,,,,,,,,
Pulacayo,,Bolivia,,,,,,"Ishihara et al., 2011, Resource Geology, v. 61, p. 174-191",,,,,,,,,,,
Reserva,,Bolivia,,,,,,"Ishihara et al., 2011, Resource Geology, v. 61, p. 174-191",,,,,,,,,,,
Rosario (Barroscota),,Bolivia,,,,,,"Kelly and Turneaure, 1970, Econ Geol, v 65, p 609",,,,,,,,,,,
San Carlos (La Riqueza),,Bolivia,,,,,,"Turneaure and Welker, 1947, Econ Geol, v 42, p 595-625",,,,,,,,,,,
San Florencia,,Bolivia,,,10,0.8,0.080,"Premoli, 1985, Natural Resources Forum, v. 9, p. 107-117",,,,,,,,,,,
San Jose,,Bolivia,15,,3,0.2,0.006,USGS Bull 1975; http://apps1.gdr.nrcan.gc.ca/gsc_minerals/gquerycache/snw/DP/dp140.html,,,,,,,,,,,
San Lorenzo,,Bolivia,,,,,,"Ishihara et al., 2011, Resource Geology, v. 61, p. 174-191",,,,,,,,,,,
San Luis (Comanche),,Bolivia,15,,753000,,,"Ishihara et al., 2011, Resource Geology, v. 61, p. 174-191",,,,,,,,,,,
San Pablo,,Bolivia,23.3,,100,0.2,0.200,"Premoli, 1985, Natural Resources Forum, v. 9, p. 107-117; Sugaki et al., 2003, Resource Geology, v 53, p. 276",,,,,,,,,,,
San Vicente,,Bolivia,18,,0.868,0.2,0.002,USGS Bull 1975,,,,,,,,,,,
Santa Fe,,Bolivia,25,,,,,"Kelly and Turneaure, 1970, Econ Geol, v 65, p 609",,,,,,,,,,,
Santa Isabel,,Bolivia,15,,0.691,0.5,0.003,USGS Bull 1975,,,,,,,,,,,
Santa Rita,,Bolivia,208,,,,,"McBride et al., 1983, Geologische Rundschau, v. 72, p. 685-713",,,,,,,,,,,
Sayaquira,,Bolivia,25,,,,,"Kelly and Turneaure, 1970, Econ Geol, v 65, p 609",,,,,,,,,,,
Siete Suyos-Animas,,Bolivia,,,,,,"Ishihara et al., 2011, Resource Geology, v. 61, p. 174-191",,,,,,,,,,,
Tanapaca,,Bolivia,28,,,,,"Kelly and Turneaure, 1970, Econ Geol, v 65, p 609",,,,,,,,,,,
Tarini,,Bolivia,24,,,,,"Kelly and Turneaure, 1970, Econ Geol, v 65, p 609; McBride et al., 1983, Geol Rundschau, v 72, p. 685",,,,,,,,,,,
Tasna,,Bolivia,16.4,,,,,"Grant et al., 1979, Econ Geol, v. 74, p. 838-851",,,,,,,,,,,
Tatasi,,Bolivia,15.6,,,,,"Grant et al., 1979, Econ Geol, v. 74, p. 838-851",,,,,,,,,,,
Tuntoko,,Bolivia,,,,,,"Ishihara et al., 2011, Resource Geology, v. 61, p. 174-191",,,,,,,,,,,
"Union (Racachas, San Alberto, Esperanza)",,Bolivia,210,,,,,"Kelly and Turneaure, 1970, Econ Geol, v 65, p 609; McBride et al., 1983, Geol Rundschau, v 72, p. 685",,,,,,,,,,,
Urania,,Bolivia,28,,0.43,1.35,0.006,"Kelly and Turneaure, 1970, Econ Geol, v 65, p 609; http://apps1.gdr.nrcan.gc.ca/gsc_minerals/gquerycache/snw/DP/dp165.html",,,,,,,,,,,
Viloco,,Bolivia,24,,,,,"Lehmann, 1990, Metallogeny of tin; USGS Bull 1975",,,,,,,,,,,
Hermyingyi,,Burma/Myanmar,59,,,,0.008,"Schwartz et al., 1995, Earth Sci Reviews, v. 38, p. 95-293",,,,,,,,,,,
Padatchaung,,Burma/Myanmar,55,,,,0.008,"Schwartz et al., 1995, Earth Sci Reviews, v. 38, p. 95-293",,,,,,,,,,,
Burnt Hill,New Brunswick,Canada,378,,,,,http://apps1.gdr.nrcan.gc.ca/gsc_minerals/gquerycache/snw/DP/dp221.html,,,,,,,,,,,
East Kemptville,Nova Scotia,Canada,366,,56,0.165,0.092,"Kontak and Chatterjee, 1992, Canadian Jour of Earth Sci, v. 29, p. 1180-1196",,,,,,,,,,,
JC,Yukon,Canada,100,,1.25,0.3,,http://apps1.gdr.nrcan.gc.ca/gsc_minerals/gquerycache/snw/DP/dp227.html,,,,,,,,,,,
Mt Pleasant,Nova Scotia,Canada,366,,5.1,0.79,0.040,"Eckstrand et al., 1995, Geology of Canadian Mineral Deposit Types: Geol Survey of Canada",,,,,,,,,,,
Amo,Yunnan,China,21.5,,,,0.05,"Zhao and Tang, 1991, Acat Geologica Sinica, v. 65, p. 42-57.",,,,,,,,,,,
Bai Sha Po (Gejiu),Yunnan,China,83.4,,,,,"Yang et al., 2008, Petrologica Sinica, v. 24, p. 1937-1944",,,,,,,,,,,
Bali (Dachang),Guangxi,China,94.5,,,,,"Pasava et al., 2003, Mineral Deposita, v. 38, p 39-66",,,,,,,,,,,
Bailashui,Hunan,China,,,,,0.51,"Laznicka, 2006, Giant Metallic Deposits, p. 320",,,,,,,,,,,
Baotan,Guangxi,China,,,,,0.1,http://apps1.gdr.nrcan.gc.ca/gsc_minerals/gquerycache/snw/DP/dp307.html,,,,,,,,,,,
Beilekuduk,Xinjiang,China,306.8,,,,,"Yang et al., Geological Revise, p. 626-640",,,,,,,,,,,
Bozhushan,Yunnan,China,,,,,,"Yang, 1991, Chinese Journal of Geochem, v 10, p. ",,,,,,,,,,,
Da'ao,Hunan,China,151,,,,,"Fu et al, 2007, Zhongguo Dizhi, v. 34, p. 651-656",,,,,,,,,,,
Dading,,China,,,,,0.2,http://apps1.gdr.nrcan.gc.ca/gsc_minerals/gquerycache/snw/DP/dp312.html,,,,,,,,,,,
Dafulou (Dachang),Guangxi,China,94.5,,4,1.1,0.044,"Pasava et al., 2003, Mineral Deposita, v. 38, p 39-66",,,,,,,,,,,
Dajing,Inner Mongolia,China,,,,,,"Wang et al., 2006, Journal of Asian Earth Science, v. 28, p. 320-331",,,,,,,,,,,
Dulong,Yunnan,China,82,,,,0.5,"Liu et al., 2007, Acta Petrologica Sinica, v. 23, p. 967-976; Laznicka, 2006",,,,,,,,,,,
Furong,Hunan,China,158,156 to 160,,,0.82,"Peng et al., 2007, Mineral Depos, v. 26, p. 237-248; Laznicka, 2006",,,,,,,,,,,
Haohadi,Yunnan,China,,,0.45,0.89,0.004005,http://apps1.gdr.nrcan.gc.ca/gsc_minerals/gquerycache/snw/DP/dp322.html,,,,,,,,,,,
Hehuaping,Hunan,China,224,,,,,"Wei et al., 2007, Acta Geologica Sinica, v. 81, p. 244-252",,,,,,,,,,,
Huanggang,Inner Mongolia,China,135,,,,,"Zhou et al., 2010, Acta Petrologica Sinica, v. 26, p. 667-679",,,,,,,,,,,
Huile (Dachang),Guangxi,China,94.5,,1,1.1,0.011,"Pasava et al., 2003, Mineral Deposita, v. 38, p 39-66",,,,,,,,,,,
Hunagshaping,Nanling region,China,162,,,,,"Lu et al., 2006, Acta Petrologica Sinica, v. 22, p, 2483-2492",,,,,,,,,,,
Kangmo (Dachang),Guangxi,China,94.5,,,,,"Pasava et al., 2003, Mineral Deposita, v. 38, p 39-66",,,,,,,,,,,
Karfang (Gejiu),Yunnan,China,83.4,,,,,"Yang et al., 2008, Petrologica Sinica, v. 24, p. 1937-1944",,,,,,,,,,,
Lamo (Dachang),Guangxi,China,94.5,,,,,"Pasava et al., 2003, Mineral Deposita, v. 38, p 39-66",,,,,,,,,,,
Laochang (Gejiu),Yunnan,China,82,,60,1.2,0.72,"Fu and Kwak, 1994, Int Geol Rev, v. 36, p. 272-292",,,,,,,,,,,
Laojunshan,Yunnan,China,,,,,,"Yang, 1991, Chinese Journal Geochem, v. 10, p.",,,,,,,,,,,
"Laoyanquan Kamusite, Galliangzi)",Junggar,China,,,,,,"Wang et al., 2011, Acta Petrol Sinica, v. 27, p. 1483-1492",,,,,,,,,,,
Longshan,Hunan,China,150,,,,,"Ma et al., 2008, Zhongguo Dizhi, v. 35, p. 706-713",,,,,,,,,,,
Longtaoshan (Dachang),Guangxi,China,94.5,,100,1.5,1.500,"Pasava et al., 2003, Mineral Deposita, v. 38, p 39-66; http://apps1.gdr.nrcan.gc.ca/gsc_minerals/gquerycache/snw/DP/dp250.html",,,,,,,,,,,
Malage (Marlage; Gejiu),Yunnan,China,82,,15,1.5,0.225,"Fu and Kwak, 1994, Int Geol Rev, v. 36, p. 272-292",,,,,,,,,,,
Mikengshan,Jiangxi,China,117,114 to 120,,,,"Qui et al., 2006, Acta Petrologica Sinica, v. 22, p. 2444-2450",,,,,,,,,,,
Piaotang,Jiangxi,China,,Jurassic,,,,http://apps1.gdr.nrcan.gc.ca/gsc_minerals/gquerycache/snw/DP/dp256.html,,,,,,,,,,,
Qilishan,Hunan,China,152,,,,,"Yuan et al., 2007, Chinese Journal Geochem, v. 27, p. 342",,,,,,,,,,,
Sabei,Xinjiang,China,324,,,,,"Lin et al., 2008, Zhongguo Dizhi (Geology in China), v. 35, p. 1197-1205",,,,,,,,,,,
Sareshiki,Xinjiang,China,306,,,,,"Tang e tal., 2007, Acta Petrologica Sinica, v. 23, p. 1989-1997",,,,,,,,,,,
Shizhuyuan,Hunan,China,146,145 to 148,170,0.028823529,0.490,"Yin et al., 2002, Journal of Asian Earth Sci, v. 20, p. 151-155; Laznicka, 2006, Giant Metallic Deposits, p. 3223",,,,,,,,,,,
"Songshujiao (Songshuje, Gejiu)",Yunnan,China,82,,,,,"Fu and Kwak, 1994, Int Geol Rev, v. 36, p. 272-292",,,,,,,,,,,
Tashan,Guangdong,China,145,,,,,"Wang and Ren, 1996, The Mesozoic volcanic-intrusive complexes and their metallogenic relations in East China: Science Press, Beijing.",,,,,,,,,,,
Tianmenshan-Hongtaoling,Jiangxi,China,152,,,,,"Feng et al., Acta geologica Sinica, v. 81, p. 952-963",,,,,,,,,,,
Tongkeng-Changpo,Guangxi,China,93,,80,1,0.800,"Cai et al., 2006, Hunan Dizhi yu Kuangchan, v. 2, p. 31-36; ",,,,,,,,,,,
Tongkeng-Changpo (Dachang),Guangxi,China,94.5,,80,1,0.800,"Cai et al., 2007, Mineral Deposita, v. 42, p. 613-626; http://apps1.gdr.nrcan.gc.ca/gsc_minerals/gquerycache/snw/DP/dp249.html",,,,,,,,,,,
Wanzijie,Yunnan,China,82,,,,0.060,"Mao et al., 1995, Acta Geol Sinica, v. 4, p. 121-177",,,,,,,,,,,
Xianghualing,Hunan,China,155,154 to 157,,,,"Yuan et al., 2008, Mineralium Deposita, v. 43, p. 375-382",,,,,,,,,,,
Xihuashan,Jiangxi,China,148,,20,0.25,0.050,"Eckstrand et al., 1995, Geol Can Ore Deps; http://apps1.gdr.nrcan.gc.ca/gsc_minerals/gquerycache/snw/DP/dp258.html",,,,,,,,,,,
Xiling; Fengdishan,Guangdong,China,150,Jurassic,20,1,0.200,"Chen et al., 1986, Geochimica, v. 1, p. 50-57; http://apps1.gdr.nrcan.gc.ca/gsc_minerals/gquerycache/snw/DP/dp300.html",,,,,,,,,,,
Xinshan (Gejiu),Yunnan,China,82,,,,,"Fu and Kwak, 1994, Int Geol Rev, v. 36, p. 272-292",,,,,,,,,,,
Yanbei,Jiangxi,China,125,,300,1,0.250,"Mei et al., 2007, Acta Geologica Sinica, v. 28, p. 456-461",,,,,,,,,,,
Yaogangxian,Hunan,China,174,,,,,"Yuan et al., 2008, Chinese Jour Geochem, v. 27, p. 342",,,,,,,,,,,
Yejiwei,Hunan,China,,Late K- Early J,,,,http://apps1.gdr.nrcan.gc.ca/gsc_minerals/gquerycache/snw/DP/dp289.html,,,,,,,,,,,
Yinyan,Guangdong,China,92,,75,0.46,0.345,"Guan et al., 1985, Acta Geologica Sinica, v. 59, p. 155-161; Eckstrand et al., 1995, Geol Can Ore Deps",,,,,,,,,,,
Yunlong,Yunnan,China,473,,,,0.05,check reference,,,,,,,,,,,
Zhongjia,Fujian,China,98,,,,,"Yang et al., 2008, Kuangchuang Dizhi, v. 27, p. 329-335",,,,,,,,,,,
Zhulin (Gejiu),Yunnan,China,82,,,,,"Fu and Kwak, 1994, Int Geol Rev, v. 36, p. 272-292",,,,,,,,,,,
Monono-Kitolo,Shaba,Congo,,,100,0.02,0.020,"Premoli, 1985, Natural Resources Forum, v. 9, p. 107-117",,,,,,,,,,,
Cinovec-Zinnwald,E Erzegebirge,Czech Republic,320,,100,0.2,0.260,"names of deposits from Stemprok, 1967, Mineralium Deposita, v. 2, p. 102-118",,,,,,,,,,,
Cista,W Erzegebirge,Czech Republic,320,,,,0.29,"names of deposits from Stemprok, 1967, Mineralium Deposita, v. 2, p. 102-118",,,,,,,,,,,
Hegelshohe,E Erzegebirge,Czech Republic,320,,,,,"names of deposits from Stemprok, 1967, Mineralium Deposita, v. 2, p. 102-118",,,,,,,,,,,
Hora Sv Sebestiana,Middle Erzegebirge,Czech Republic,320,,,,,"names of deposits from Stemprok, 1967, Mineralium Deposita, v. 2, p. 102-118",,,,,,,,,,,
Horni Blatna,W Erzegebirge,Czech Republic,320,,,,,"names of deposits from Stemprok, 1967, Mineralium Deposita, v. 2, p. 102-118",,,,,,,,,,,
Hrebecna,W Erzegebirge,Czech Republic,320,,,,,"names of deposits from Stemprok, 1967, Mineralium Deposita, v. 2, p. 102-118",,,,,,,,,,,
Hub,,Czech Republic,320,,35,0.3,0.105,"Premoli, 1985, Natural Resources Forum, v. 9, p. 107-117",,,,,,,,,,,
Huberstock (Krasno),W Erzegebirge,Czech Republic,320,,,,0.29,"names of deposits from Stemprok, 1967, Mineralium Deposita, v. 2, p. 102-118",,,,,,,,,,,
Krupka (Knotl),E Erzegebirge,Czech Republic,320,,,,,"names of deposits from Stemprok, 1967, Mineralium Deposita, v. 2, p. 102-118",,,,,,,,,,,
Krupka (Preisselberg),E Erzegebirge,Czech Republic,320,,,,,"names of deposits from Stemprok, 1967, Mineralium Deposita, v. 2, p. 102-118",,,,,,,,,,,
Pobershau,Middle Erzegebirge,Czech Republic,320,,,,,"names of deposits from Stemprok, 1967, Mineralium Deposita, v. 2, p. 102-118",,,,,,,,,,,
Podlesi,W Erzegebirge,Czech Republic,320,,,,,"names of deposits from Stemprok, 1967, Mineralium Deposita, v. 2, p. 102-118",,,,,,,,,,,
Schnodenstock (Krasno),W Erzegebirge,Czech Republic,320,,,,,"names of deposits from Stemprok, 1967, Mineralium Deposita, v. 2, p. 102-118",,,,,,,,,,,
Balleswidden,Cornwall,England,280,,0.011828,65,0.008,http://apps1.gdr.nrcan.gc.ca/gsc_minerals/gquerycache/snw/DP/dp924.html,,,,,,,,,,,
Bassett,Cornwall,England,280,,0.04314,65,0.028,http://apps1.gdr.nrcan.gc.ca/gsc_minerals/gquerycache/snw/DP/dp877.html,,,,,,,,,,,
Bassett-Grylls,Cornwall,England,280,,0.0465,65,0.030,http://apps1.gdr.nrcan.gc.ca/gsc_minerals/gquerycache/snw/DP/dp931.html,,,,,,,,,,,
BirchTor-Vitifer,Devon,England,280,,,,,http://apps1.gdr.nrcan.gc.ca/gsc_minerals/gquerycache/snw/DP/dp895.html,,,,,,,,,,,
Blue Hills,Cornwall,England,280,,0.002212,65,0.001,http://apps1.gdr.nrcan.gc.ca/gsc_minerals/gquerycache/snw/DP/dp905.html,,,,,,,,,,,
Botallack-Wheal Cock,"Cornwall, St Just",England,280,,0.015,65,0.010,http://apps1.gdr.nrcan.gc.ca/gsc_minerals/gquerycache/snw/DP/dp925.html,,,,,,,,,,,
Callington United-Redmoor,Cornwall,England,280,,4,0.4,0.016,http://apps1.gdr.nrcan.gc.ca/gsc_minerals/gquerycache/snw/DP/dp873.html,,,,,,,,,,,
Carn Brea-Tincroft,Cornwall,England,280,,0.057706,65,0.038,http://apps1.gdr.nrcan.gc.ca/gsc_minerals/gquerycache/snw/DP/dp878.html,,,,,,,,,,,
Charlestown United-Cuddra Consolidated,Cornwall,England,280,,,,,http://apps1.gdr.nrcan.gc.ca/gsc_minerals/gquerycache/snw/DP/dp910.html,,,,,,,,,,,
Cooks Kitchen,Cornwall,England,280,,0.008859,65,0.006,http://apps1.gdr.nrcan.gc.ca/gsc_minerals/gquerycache/snw/DP/dp879.html,,,,,,,,,,,
Ding Dong,Cornwall,England,280,,0.003475,65,0.002,http://apps1.gdr.nrcan.gc.ca/gsc_minerals/gquerycache/snw/DP/dp926.html,,,,,,,,,,,
Dolcoath,Cornwall,England,280,,0.08,65,0.052,http://apps1.gdr.nrcan.gc.ca/gsc_minerals/gquerycache/snw/DP/dp880.html,,,,,,,,,,,
Drakewalls,Cornwall,England,280,,,,0.00353145,http://apps1.gdr.nrcan.gc.ca/gsc_minerals/gquerycache/snw/DP/dp874.html,,,,,,,,,,,
East Lovell,Cornwall,England,280,,0.002407,65,0.002,http://apps1.gdr.nrcan.gc.ca/gsc_minerals/gquerycache/snw/DP/dp932.html,,,,,,,,,,,
East Pool Agar,Cornwall,England,280,,0.04046,65,0.026,http://apps1.gdr.nrcan.gc.ca/gsc_minerals/gquerycache/snw/DP/dp881.html,,,,,,,,,,,
Eliza Consolidated,Cornwall,England,280,,0.009425,65,0.006,http://apps1.gdr.nrcan.gc.ca/gsc_minerals/gquerycache/snw/DP/dp911.html,,,,,,,,,,,
Geevor,Cornwall,England,268,,0.054026,65,0.035,"Chesley et al., 1993, Geochimica, v. 57, p. 1817; Eckstrand et al., 1995, Geol Cana Ore Deps; http://apps1.gdr.nrcan.gc.ca/gsc_minerals/gquerycache/snw/DP/dp927.html",,,,,,,,,,,
Great Condurrow,Cornwall,England,280,,0.00203,65,0.001,http://apps1.gdr.nrcan.gc.ca/gsc_minerals/gquerycache/snw/DP/dp882.html,,,,,,,,,,,
Great Fortune,Cornwall,England,280,,0.002992,65,0.002,http://apps1.gdr.nrcan.gc.ca/gsc_minerals/gquerycache/snw/DP/dp898.html,,,,,,,,,,,
Great Work,Cornwall,England,280,,0.06256,65,0.041,http://apps1.gdr.nrcan.gc.ca/gsc_minerals/gquerycache/snw/DP/dp899.html,,,,,,,,,,,
Grenville United,Cornwall,England,280,,0.026073,65,0.017,http://apps1.gdr.nrcan.gc.ca/gsc_minerals/gquerycache/snw/DP/dp883.html,,,,,,,,,,,
Gunnislake,Cornwall,England,285,,0.001348,65,0.001,http://apps1.gdr.nrcan.gc.ca/gsc_minerals/gquerycache/snw/DP/dp875.html,,,,,,,,,,,
Hemerdon,Cornwall,England,280,,42,0.025,0.011,"Eckstrand et al., 1995, Geol Can Ore Deps",,,,,,,,,,,
Hewas,Cornwall,England,280,,0.00288,65,0.002,http://apps1.gdr.nrcan.gc.ca/gsc_minerals/gquerycache/snw/DP/dp912.html,,,,,,,,,,,
Jane-Mt Wellington,Cornwall,England,280,,2.38,0.89,0.021,http://apps1.gdr.nrcan.gc.ca/gsc_minerals/gquerycache/snw/DP/dp884.html,,,,,,,,,,,
Killfreth,Cornwall,England,280,,0.00406,65,0.003,http://apps1.gdr.nrcan.gc.ca/gsc_minerals/gquerycache/snw/DP/dp885.html,,,,,,,,,,,
Kitty-Penhalls,Cornwall,England,280,,0.013121,65,0.009,http://apps1.gdr.nrcan.gc.ca/gsc_minerals/gquerycache/snw/DP/dp906.html,,,,,,,,,,,
Levant-North Levant- Boscawell,Cornwall,England,280,,0.024,65,0.016,"Taylor, 1979, Geol of Tin Deps, p. 145",,,,,,,,,,,
Lewis,Cornwall,England,280,,0.001275,65,0.001,http://apps1.gdr.nrcan.gc.ca/gsc_minerals/gquerycache/snw/DP/dp900.html,,,,,,,,,,,
Magdalen,Cornwall,England,280,,,,,Mineral Deposits of Europe,,,,,,,,,,,
Mulberry,Cornwall,England,280,,0.00135,65,0.001,http://apps1.gdr.nrcan.gc.ca/gsc_minerals/gquerycache/snw/DP/dp913.html,,,,,,,,,,,
North Crofty,Cornwall,England,280,,0.001651,65,0.001,http://apps1.gdr.nrcan.gc.ca/gsc_minerals/gquerycache/snw/DP/dp887.html,,,,,,,,,,,
North Roskear,Cornwall,England,280,,0.001557,65,0.001,http://apps1.gdr.nrcan.gc.ca/gsc_minerals/gquerycache/snw/DP/dp886.html,,,,,,,,,,,
Okehampton,Cornwall,England,280,,,,,Mineral Deposits of Europe,,,,,,,,,,,
Owles,Cornwall,England,280,,0.0854,65,0.056,http://apps1.gdr.nrcan.gc.ca/gsc_minerals/gquerycache/snw/DP/dp929.html,,,,,,,,,,,
Par Consols,Cornwall,England,280,,0.003785,65,0.002,http://apps1.gdr.nrcan.gc.ca/gsc_minerals/gquerycache/snw/DP/dp914.html,,,,,,,,,,,
Parbola,Cornwall,England,280,,,,,Mineral Deposits of Europe,,,,,,,,,,,
Pedn-an-Drea,Cornwall,England,280,,0.0077,65,0.005,http://apps1.gdr.nrcan.gc.ca/gsc_minerals/gquerycache/snw/DP/dp888.html,,,,,,,,,,,
Peevor,Cornwall,England,280,,0.00328,65,0.002,http://apps1.gdr.nrcan.gc.ca/gsc_minerals/gquerycache/snw/DP/dp889.html,,,,,,,,,,,
Pembroke,Cornwall,England,280,,0.00205,65,0.001,http://apps1.gdr.nrcan.gc.ca/gsc_minerals/gquerycache/snw/DP/dp915.html,,,,,,,,,,,
Pendarves,Cornwall,England,280,,,,,Mineral Deposits of Europe,,,,,,,,,,,
Phoenix United,Cornwall,England,280,,0.01666,65,0.011,http://apps1.gdr.nrcan.gc.ca/gsc_minerals/gquerycache/snw/DP/dp897.html,,,,,,,,,,,
Polberro,Cornwall,England,280,,0.004885,65,0.003,http://apps1.gdr.nrcan.gc.ca/gsc_minerals/gquerycache/snw/DP/dp907.html,,,,,,,,,,,
Polgoth/Fatwor,Cornwall,England,280,,0.003,65,0.002,Mineral Deposits of Europe; http://apps1.gdr.nrcan.gc.ca/gsc_minerals/gquerycache/snw/DP/dp916.html,,,,,,,,,,,
Prosper,Cornwall,England,272,,0.003,65,0.002,http://apps1.gdr.nrcan.gc.ca/gsc_minerals/gquerycache/snw/DP/dp917.html,,,,,,,,,,,
Providence,Cornwall,England,280,,0.002357,65,0.002,http://apps1.gdr.nrcan.gc.ca/gsc_minerals/gquerycache/snw/DP/dp919.html,,,,,,,,,,,
Reath,Cornwall,England,280,,0.003305,65,0.002,http://apps1.gdr.nrcan.gc.ca/gsc_minerals/gquerycache/snw/DP/dp920.html,,,,,,,,,,,
Relistian,Cornwall,England,280,,,,,Mineral Deposits of Europe,,,,,,,,,,,
Rosevale,Cornwall,England,280,,,,,http://www.bgs.ac.uk/discoveringGeology/geologyOfBritain/holidayguides/cornwall.htm,,,,,,,,,,,
Sisters,Cornwall,England,280,,0.013245,65,0.009,http://apps1.gdr.nrcan.gc.ca/gsc_minerals/gquerycache/snw/DP/dp921.html,,,,,,,,,,,
South Crofty,Cornwall,England,286,,3.85,1.55,0.060,"Chesley et al., 1993, Geochimica, v. 57, p. 1817; Eckstrand et al., 1995, Geol Cana Ore Deps ",,,,,,,,,,,
St. Ives Consols,Cornwall,England,280,,0.01815,65,0.012,http://apps1.gdr.nrcan.gc.ca/gsc_minerals/gquerycache/snw/DP/dp922.html,,,,,,,,,,,
Tavistock,Cornwall,England,280,,,,,Mineral Deposits of Europe,,,,,,,,,,,
Tregurtha Downs-Hampton,Cornwall,England,280,,0.001649,65,0.001,http://apps1.gdr.nrcan.gc.ca/gsc_minerals/gquerycache/snw/DP/dp901.html,,,,,,,,,,,
Tremayne,Cornwall,England,280,,0.015962,65,0.010,http://apps1.gdr.nrcan.gc.ca/gsc_minerals/gquerycache/snw/DP/dp896.html,,,,,,,,,,,
Tresavean,Cornwall,England,280,,0.0044,65,0.003,http://apps1.gdr.nrcan.gc.ca/gsc_minerals/gquerycache/snw/DP/dp891.html,,,,,,,,,,,
Trumpet Consols,Cornwall,England,280,,0.004542,65,0.003,http://apps1.gdr.nrcan.gc.ca/gsc_minerals/gquerycache/snw/DP/dp933.html,,,,,,,,,,,
Uny,Cornwall,England,280,,0.00766,65,0.005,http://apps1.gdr.nrcan.gc.ca/gsc_minerals/gquerycache/snw/DP/dp892.html,,,,,,,,,,,
Vor,Cornwall,England,280,,0.00962,65,0.006,http://apps1.gdr.nrcan.gc.ca/gsc_minerals/gquerycache/snw/DP/dp902.html,,,,,,,,,,,
Wendron Consols,Cornwall,England,280,,0.00293,65,0.002,http://apps1.gdr.nrcan.gc.ca/gsc_minerals/gquerycache/snw/DP/dp934.html,,,,,,,,,,,
West Godolphin,Cornwall,England,280,,0.00156,65,0.001,http://apps1.gdr.nrcan.gc.ca/gsc_minerals/gquerycache/snw/DP/dp903.html,,,,,,,,,,,
West Seton,Cornwall,England,,,0.004045,65,0.003,http://apps1.gdr.nrcan.gc.ca/gsc_minerals/gquerycache/snw/DP/dp893.html,,,,,,,,,,,
"Wheal Coates, St. Agnes",Cornwall,England,280,,,,,http://www.bgs.ac.uk/discoveringGeology/geologyOfBritain/holidayguides/cornwall.htm,,,,,,,,,,,
Wheal Roots,Cornwall,England,280,,,,,http://www.bgs.ac.uk/discoveringGeology/geologyOfBritain/holidayguides/cornwall.htm,,,,,,,,,,,
Wheal Trenwith,Cornwall,England,280,,,,,Mineral Deposits of Europe,,,,,,,,,,,
Wheal Vincent,Cornwall,England,280,,,,,Mineral Deposits of Europe,,,,,,,,,,,
Allier,,France,,,50,0.13,0.065,"Premoli, 1985, Natural Resources Forum, v. 9, p. 107-117",,,,,,,,,,,
Blond,Massif Central,France,310,,,,,"Lehmann, 1990, Metallogeny of tin",,,,,,,,,,,
Echassieres,Massif Central,France,310,,21,0.13,0.027,"Lehmann, 1990, Metallogeny of tin",,,,,,,,,,,
Montbelleux,,France,,,2.8,0.17,0.005,http://apps1.gdr.nrcan.gc.ca/gsc_minerals/gquerycache/snw/DP/dp402.html,,,,,,,,,,,
Montebras,Massif Central,France,310,,,,,"Lehmann, 1990, Metallogeny of tin",,,,,,,,,,,
Saint-Sylvestre,Massif Central,France,310,,,,,"Lehmann, 1990, Metallogeny of tin",,,,,,,,,,,
Altenberg,Middle Erzegebirge,Germany,324,,70,0.25,0.210,"Premoli, 1985, Natural Resources Forum, v. 9, p. 107-117",,,,,,,,,,,
Auersberg,W Erzegebirge,Germany,320,,,,,"names of deposits from Stemprok, 1967, Mineralium Deposita, v. 2, p. 102-118",,,,,,,,,,,
Donitzgrund,W Erzegebirge,Germany,320,,,,,"names of deposits from Stemprok, 1967, Mineralium Deposita, v. 2, p. 102-118",,,,,,,,,,,
Ehrenfriedersdorf (Sauerberg),Middle Erzegebirge,Germany,324,,,,,"Romer and Thomas, v 2005, Proceedins of the SGA Meeting, Beijing, p. 817-820",,,,,,,,,,,
Felsithorizont Halsbrucker,E Erzegebirge,Germany,320,,,,,"names of deposits from Stemprok, 1967, Mineralium Deposita, v. 2, p. 102-118",,,,,,,,,,,
Geyer,Middle Erzegebirge,Germany,320,,,,,"names of deposits from Stemprok, 1967, Mineralium Deposita, v. 2, p. 102-118",,,,,,,,,,,
Gottesberg,W Erzegebirge,Germany,320,,,,,"names of deposits from Stemprok, 1967, Mineralium Deposita, v. 2, p. 102-118",,,,,,,,,,,
Hub,W Erzegebirge,Germany,320,,35,0.3,0.105,"Taylor, 1979, Geol of Tin Deps, p. 244",,,,,,,,,,,
Lauterbach,W Erzegebirge,Germany,320,,,,,"names of deposits from Stemprok, 1967, Mineralium Deposita, v. 2, p. 102-118",,,,,,,,,,,
Pohla-Hammerlein,W Erzegebirge,Germany,270,,0.058,0.42,0.300000,"Laznicka, 2006, Giant Metallic Deposits, p. 320",,,,,,,,,,,
Prebuz,W Erzegebirge,Germany,320,,,,,"names of deposits from Stemprok, 1967, Mineralium Deposita, v. 2, p. 102-118",,,,,,,,,,,
Rolava,W Erzegebirge,Germany,320,,,,,"names of deposits from Stemprok, 1967, Mineralium Deposita, v. 2, p. 102-118",,,,,,,,,,,
Sadisdorf,E Erzegebirge,Germany,320,,,,,"names of deposits from Stemprok, 1967, Mineralium Deposita, v. 2, p. 102-118",,,,,,,,,,,
Seiffen,E Erzegebirge,Germany,301,,,,,"names of deposits from Stemprok, 1967, Mineralium Deposita, v. 2, p. 102-118",,,,,,,,,,,
Tannenberg,W Erzegebirge,Germany,320,,,,,"names of deposits from Stemprok, 1967, Mineralium Deposita, v. 2, p. 102-118",,,,,,,,,,,
Tosham,Haryana,India,793,,,,,"Murao et al., 2008, Ore Geology Reviews, v. 33, p. 490-504",,,,,,,,,,,
Batu Besi,Belitung,Indonesia,200,,,,0.003,"Schwartz et al., 1995, Earth Sci Reviews, v. 38, p. 95-293",,,,,,,,,,,
Batu Pancur,Belitung,Indonesia,200,,,,,"Jones et al., 1977, Econ Geol, v. 72, p. 745-752",,,,,,,,,,,
Bukit Bais,Banka,Indonesia,251,,,,0.003,"Schwartz et al., 1995, Earth Sci Reviews, v. 38, p. 95-293",,,,,,,,,,,
Garumedang,Belitung,Indonesia,200,,,,0.003,"Schwartz et al., 1995, Earth Sci Reviews, v. 38, p. 95-293",,,,,,,,,,,
Hatapang,,Indonesia,78,,,,0.00025,"Schwartz et al., 1995, Earth Sci Reviews, v. 38, p. 95-293",,,,,,,,,,,
Kelapa,Belitung,Indonesia,200,,2,1.2,0.024,"Schwartz et al., 1995, Earth Sci Reviews, v. 38, p. 95-293; Eckstrand et al., 1995, Geol Can Ore Deps",,,,,,,,,,,
Nam Salu,Kelapa Kampit,Indonesia,,,,,,"Schwartz and Surjono, 1990, Econ Geol, v. 85, p. 76-98",,,,,,,,,,,
Pemali,Banka,Indonesia,251,,,,0.01,"Schwartz et al., 1995, Earth Sci Reviews, v. 38, p. 95-293",,,,,,,,,,,
Selumar,Belitung,Indonesia,200,,,,0.003,"Schwartz et al., 1995, Earth Sci Reviews, v. 38, p. 95-293",,,,,,,,,,,
Sungai Isahan,,Indonesia,197,,,,0.00025,"Schwartz et al., 1995, Earth Sci Reviews, v. 38, p. 95-293",,,,,,,,,,,
Tebrong,Belitung,Indonesia,212,,,,0.003,"Schwartz et al., 1995, Earth Sci Reviews, v. 38, p. 95-293",,,,,,,,,,,
Templiang,Banka,Indonesia,211,,,,0.003,"Schwartz et al., 1995, Earth Sci Reviews, v. 38, p. 95-293",,,,,,,,,,,
Tikus,Belitung,Indonesia,195,,,,0.01,"Jones et al., 1977, Econ Geol, v. 72, p. 745-752",,,,,,,,,,,
Monte Valerio,Tuscany,Italy,,,1,0.4,0.004,http://apps1.gdr.nrcan.gc.ca/gsc_minerals/gquerycache/snw/DP/dp436.html,,,,,,,,,,,
Akenobe,,Japan,65,Late Cretaceous,17,0.4,0.068,"Shimizu and Kato, 1991, Canadian Mineralogist, v 29, p. 207-215; Watanabe et al., 19998, OGR, v 12, p. 267-288; Eckstrand et al., 1995, Geol Cana Ore Deps",,,,,,,,,,,
Ashio,,Japan,,,,,,"Shimizu et al., 2008, Far Eastern Studies, v. 7, p. 23",,,,,,,,,,,
Fukoku,,Japan,,,,,,"Shimizu and Kato, 1991, Canadian Mineralogist, v 29, p. 207-215",,,,,,,,,,,
Fukuoku,,Japan,,,,,,"Shimizu and Kato, 1991, Canadian Mineralogist, v 29, p. 207-215",,,,,,,,,,,
Goka,Naegi,Japan,70.4,,,,,"Murao et al., 2008, Ore Geology Reviews, v. 33, p. 490-504",,,,,,,,,,,
Hoei,,Japan,,,,,,"Shimizu et al., 2008, Far Eastern Studies, v. 7, p. 23",,,,,,,,,,,
Ikuno,,Japan,74.6,,,,,"Shimizu and Kato, 1991, Canadian Mineralogist, v 29, p. 207-215; Watanabe et al., 19998, OGR, v 12, p. 267-288",,,,,,,,,,,
Inakuraishi,,Japan,2,,,,,"Ohta, 1995, Resource Geology Special Issue, no 18, p. 187-195",,,,,,,,,,,
Jokoku,,Japan,2,,,,,"Ohta, 1995, Resource Geology Special Issue, no 18, p. 187-195",,,,,,,,,,,
Kamioka,,Japan,,,,,,"Watanabe et al., 1998, OGR, v. 12, p. 267-288",,,,,,,,,,,
Kaneuchi,,Japan,,,,,,"Shimizu et al.,2008,  Far Eastern Studies, v 7, p. 23-31",,,,,,,,,,,
Kano,,Japan,,,,,,"Shimizu et al., 2008, Far Eastern Studies, v. 7, p. 23",,,,,,,,,,,
Kishu,,Japan,,,,,,from map - check reference,,,,,,,,,,,
Kiura,,Japan,,,,,,from map - check reference,,,,,,,,,,,
Konjjo,,Japan,,,,,,"Shimizu and Kato, 1991, Canadian Mineralogist, v 29, p. 207-215",,,,,,,,,,,
Kudo,,Japan,2,,,,,"Ohta, 1995, Resource Geology Special Issue, no 18, p. 187-195",,,,,,,,,,,
Kuga,,Japan,,,,,,"Shimizu et al., 2008, Far Eastern Studies, v. 7, p. 23",,,,,,,,,,,
Kutosan,,Japan,2,,,,,"Ohta, 1995, Resource Geology Special Issue, no 18, p. 187-195",,,,,,,,,,,
Nakakoshi,,Japan,,,,,,from map - check reference,,,,,,,,,,,
Naktatsu,,Japan,,,,,,"Shimizu et al., 2008, Far Eastern Studies, v. 7, p. 23",,,,,,,,,,,
Obira,,Japan,,,,,,"Shimizu et al., 2008, Far Eastern Studies, v. 7, p. 23",,,,,,,,,,,
Ohmidani,,Japan,,,,,,"Shimizu and Kato, 1991, Canadian Mineralogist, v 29, p. 207-215",,,,,,,,,,,
Ohtani,,Japan,93.5,,,,,"Watanabe et al., 19998, OGR, v 12, p. 267-288",,,,,,,,,,,
Omidani,,Japan,,,,,,"Shimizu and Kato, 1991, Canadian Mineralogist, v 29, p. 207-215",,,,,,,,,,,
Omodani,,Japan,,,,,,"Shimizu et al., 2008, Far Eastern Studies, v. 7, p. 23",,,,,,,,,,,
Oshamanbe,,Japan,2,,,,,"Ohta, 1995, Resource Geology Special Issue, no 18, p. 187-195",,,,,,,,,,,
Setoda,,Japan,,,,,,"Shimizu et al., 2008, Far Eastern Studies, v. 7, p. 23",,,,,,,,,,,
Shinkiura,,Japan,,,,,,from map - check reference,,,,,,,,,,,
Suttsu,,Japan,2,,,,,"Ohta, 1995, Resource Geology Special Issue, no 18, p. 187-195",,,,,,,,,,,
Suzuyama,,Japan,,,,,,"Shimizu et al., 2008, Far Eastern Studies, v. 7, p. 23",,,,,,,,,,,
Tada,,Japan,,,,,,"Shimizu and Kato, 1991, Canadian Mineralogist, v 29, p. 207-215",,,,,,,,,,,
Takatori,,Japan,,,,,,"Shimizu et al., 2008, Far Eastern Studies, v. 7, p. 23",,,,,,,,,,,
Titate,,Japan,,,,,,from map - check reference,,,,,,,,,,,
Toroku,,Japan,,,,,,from map - check reference,,,,,,,,,,,
Toyoha,,Japan,2,,,,,"Ohta, 1995, Resource Geology Special Issue, no 18, p. 187-195",,,,,,,,,,,
Tsumo,,Japan,,,,,,"Shimizu et al., 2008, Far Eastern Studies, v. 7, p. 23",,,,,,,,,,,
Yatani,,Japan,,,,,,"Shimizu et al., 2008, Far Eastern Studies, v. 7, p. 23",,,,,,,,,,,
Atjailau (Saryjaz),,Kyrgyzstan,275,,,,,"Solomovich et al., 2012, Ore Geol Rev, v. 44, p 59-69",,,,,,,,,,,
Sarubulak (Saryjaz),,Kyrgyzstan,275,,,,,"Solomovich et al., 2012, Ore Geol Rev, v. 44, p 59-69",,,,,,,,,,,
Trudevoe (Saryjaz),,Kyrgyzstan,275,,,,0.089,"Solomovich et al., 2012, Ore Geol Rev, v. 44, p 59-69",,,,,,,,,,,
Uchkoshkon (Saryjaz),,Kyrgyzstan,275,,,0.53,0.06,"Solomovich et al., 2012, Ore Geol Rev, v. 44, p 59-69",,,,,,,,,,,
Air Hangat,,Malaysia,214,,,,0.003,"Schwartz et al., 1995, Earth Sci Reviews, v. 38, p. 95-293",,,,,,,,,,,
Ampang,,Malaysia,202,,,,0.00025,"Schwartz et al., 1995, Earth Sci Reviews, v. 38, p. 95-293",,,,,,,,,,,
Batu Tiga,,Malaysia,227,,,,0.01,"Schwartz et al., 1995, Earth Sci Reviews, v. 38, p. 95-293",,,,,,,,,,,
Beatrice,,Malaysia,213,,,,0.01,"Schwartz et al., 1995, Earth Sci Reviews, v. 38, p. 95-293",,,,,,,,,,,
Bruseh,,Malaysia,199,,,,0.003,"Schwartz et al., 1995, Earth Sci Reviews, v. 38, p. 95-293",,,,,,,,,,,
Bukit Bandi,,Malaysia,227,,,,0.003,"Schwartz et al., 1995, Earth Sci Reviews, v. 38, p. 95-293",,,,,,,,,,,
Bukit Besi,,Malaysia,227,,,,0.01,"Schwartz et al., 1995, Earth Sci Reviews, v. 38, p. 95-293",,,,,,,,,,,
Bukit Bidong,,Malaysia,230,,,,0.003,"Schwartz et al., 1995, Earth Sci Reviews, v. 38, p. 95-293",,,,,,,,,,,
Bukit Lentor,,Malaysia,227,,,,0.003,"Schwartz et al., 1995, Earth Sci Reviews, v. 38, p. 95-293",,,,,,,,,,,
Bukit Sulai,,Malaysia,208,,,,0.003,"Schwartz et al., 1995, Earth Sci Reviews, v. 38, p. 95-293",,,,,,,,,,,
Changk Rembian,,Malaysia,199,,,,0.003,"Schwartz et al., 1995, Earth Sci Reviews, v. 38, p. 95-293",,,,,,,,,,,
Chemore River,,Malaysia,213,,,,0.003,"Schwartz et al., 1995, Earth Sci Reviews, v. 38, p. 95-293",,,,,,,,,,,
Gunug Jerai,,Malaysia,137,,,,0.00025,"Schwartz et al., 1995, Earth Sci Reviews, v. 38, p. 95-293",,,,,,,,,,,
Gunung Bakau,,Malaysia,214,,,,0.003,"Schwartz et al., 1995, Earth Sci Reviews, v. 38, p. 95-293",,,,,,,,,,,
Gunung Paku,Upper Perak,Malaysia,200,184 to 230,,,,"Ariffin, 2009, Resource Geology, v. 59, p. 282-294",,,,,,,,,,,
Kamang Kemaman,,Malaysia,227,,,,0.003,"Schwartz et al., 1995, Earth Sci Reviews, v. 38, p. 95-293",,,,,,,,,,,
Kinta Valley,,Malaysia,200,,,,2.000,"Lehmann, 1990, Metallogeny of tin, p. 190",,,,,,,,,,,
Klian Intan,,Malaysia,59,,,,0.01,"Schwartz et al., 1995, Earth Sci Reviews, v. 38, p. 95-293",,,,,,,,,,,
Kramat Pulai,,Malaysia,198,,,,0.01,"Schwartz et al., 1995, Earth Sci Reviews, v. 38, p. 95-293",,,,,,,,,,,
Lahat,,Malaysia,208,,,,0.003,"Schwartz et al., 1995, Earth Sci Reviews, v. 38, p. 95-293",,,,,,,,,,,
Menglembu,,Malaysia,208,,,,0.003,"Schwartz et al., 1995, Earth Sci Reviews, v. 38, p. 95-293",,,,,,,,,,,
Murai,,Malaysia,214,,,,0.003,"Schwartz et al., 1995, Earth Sci Reviews, v. 38, p. 95-293",,,,,,,,,,,
Pelapah Kanan,,Malaysia,218,,,,0.01,"Schwartz et al., 1995, Earth Sci Reviews, v. 38, p. 95-293",,,,,,,,,,,
Sintok,,Malaysia,82,,,,0.003,"Schwartz et al., 1995, Earth Sci Reviews, v. 38, p. 95-293",,,,,,,,,,,
Sugai Panching,,Malaysia,208,,,,0.003,"Schwartz et al., 1995, Earth Sci Reviews, v. 38, p. 95-293",,,,,,,,,,,
Sungai Besi,,Malaysia,202,,,,0.003,"Schwartz et al., 1995, Earth Sci Reviews, v. 38, p. 95-293",,,,,,,,,,,
Sungai Gao,,Malaysia,199,,,,0.003,"Schwartz et al., 1995, Earth Sci Reviews, v. 38, p. 95-293",,,,,,,,,,,
Sungai Lembing,,Malaysia,208,,,,0.01,"Schwartz et al., 1995, Earth Sci Reviews, v. 38, p. 95-293",,,,,,,,,,,
Sungai Meranti,,Malaysia,214,,,,0.003,"Schwartz et al., 1995, Earth Sci Reviews, v. 38, p. 95-293",,,,,,,,,,,
Tekka,,Malaysia,213,,,,0.003,"Schwartz et al., 1995, Earth Sci Reviews, v. 38, p. 95-293",,,,,,,,,,,
Tengu Makota,,Malaysia,208,,,,0.003,"Schwartz et al., 1995, Earth Sci Reviews, v. 38, p. 95-293",,,,,,,,,,,
Titi-Glami,,Malaysia,156,,,,0.003,"Schwartz et al., 1995, Earth Sci Reviews, v. 38, p. 95-293",,,,,,,,,,,
Toh Kiri,,Malaysia,180,,,,0.003,"Schwartz et al., 1995, Earth Sci Reviews, v. 38, p. 95-293",,,,,,,,,,,
Ulu Chagar,,Malaysia,214,,,,0.003,"Schwartz et al., 1995, Earth Sci Reviews, v. 38, p. 95-293",,,,,,,,,,,
Wing Sang Cheong,,Malaysia,201,,,,0.00025,"Schwartz et al., 1995, Earth Sci Reviews, v. 38, p. 95-293",,,,,,,,,,,
Cerro de los Remedios,,Mexico,31,,,,,"Tuta et al., 1988, Econ Geol, v. 83, p. 1931-1942",,,,,,,,,,,
Guadalcazar,,Mexico,28,,,,,"Tuta et al., 1988, Econ Geol, v. 83, p. 1931-1942",,,,,,,,,,,
La Ochoa,,Mexico,30,,,,,"Tuta et al., 1988, Econ Geol, v. 83, p. 1931-1942",,,,,,,,,,,
Sombrerete,,Mexico,30,,,,,"Tuta et al., 1988, Econ Geol, v. 83, p. 1931-1942",,,,,,,,,,,
Khar Mosit,,Mongolia,,,,,,http://apps1.gdr.nrcan.gc.ca/gsc_minerals/gquerycache/snw/DP/dp528.html,,,,,,,,,,,
Djebel-Aouam-Tighza,,Morroco,290,,,,,"Cheilletz et al., 2009, SGA Townsville",,,,,,,,,,,
Brandberg West-Goantagab,,Namibia,509,,,,,"Walraven, 1989; Jacob and Kruger, 1994 (in Macey and Harris, 2006, Miner Deposita, v 41, p. 671-690",,,,,,,,,,,
Erongo-Karibib,,Namibia,509,,,,,"Walraven, 1989; Jacob and Kruger, 1994 (in Macey and Harris, 2006, Miner Deposita, v 41, p. 671-690",,,,,,,,,,,
Neneis-Kohero,,Namibia,509,,,,,"Walraven, 1989; Jacob and Kruger, 1994 (in Macey and Harris, 2006, Miner Deposita, v 41, p. 671-690",,,,,,,,,,,
Strathmore-Uis,,Namibia,509,,,,,"Walraven, 1989; Jacob and Kruger, 1994 (in Macey and Harris, 2006, Miner Deposita, v 41, p. 671-690",,,,,,,,,,,
Uis,,Namibia,509,,33,0.14,0.046,"Premoli, 1985, Natural Resources Forum, v. 9, p. 107-117; Laznicka, 2006, Giant Metallic Deposits, p. 324",,,,,,,,,,,
Zinder,,Niger,325,Jurassic,,,,"Wright, 1970, Econ Geol, v. 65, p. 945-951",,,,,,,,,,,
Afu (Odegi),,Nigeria,252,Jurassic,,,,"Kinnaird, 1984, Jour of African Earth Sci, v. 2, p. 81-90",,,,,,,,,,,
Jos-Bukuru (Rayfield and Jantar),,Nigeria,275,Jurassic,,,,"Kinnaird, 1984, Jour of African Earth Sci, v. 2, p. 81-90",,,,,,,,,,,
Ririwai,,Nigeria,176,Jurassic,,,,"Imeokparia, 1983, Jour Geochem Explo, v. 19, p. 643-661",,,,,,,,,,,
Saiya Shokobo,,Nigeria,176,Jurassic,,,,"Kinnaird, 1984, Jour of African Earth Sci, v. 2, p. 81-90",,,,,,,,,,,
Tibchi,,Nigeria,176,Jurassic,,,,"Kinnaird, 1984, Jour of African Earth Sci, v. 2, p. 81-90",,,,,,,,,,,
San Rafael,,Peru,24,22.6 to 25.9,2,1.75,0.035,"Clark et al., 1983, Econ Geol, v 78, p. 514-520; Eckstrand et al., 1995, Geol of Canadian Ore Deps",,,,,,,,,,,
Santo Domingo,,Peru,24.3,,,,,"Clark et al., 1983, Econ Geol, v 78, p. 514-520",,,,,,,,,,,
Argozelo,,Portugal,,,,,,http://apps1.gdr.nrcan.gc.ca/gsc_minerals/gquerycache/snw/DP/dp587.html,,,,,,,,,,,
Barrigao,,Portugal,,,,,,"Reiser et al., 2011, Int Geol Rev, v. 53, p. 9",,,,,,,,,,,
Bejanca,,Portugal,,,,,,http://apps1.gdr.nrcan.gc.ca/gsc_minerals/gquerycache/snw/DP/dp594.html,,,,,,,,,,,
Ervedosa,,Portugal,,,,,,http://apps1.gdr.nrcan.gc.ca/gsc_minerals/gquerycache/snw/DP/dp588.html,,,,,,,,,,,
Lagares,,Portugal,,,,,,http://apps1.gdr.nrcan.gc.ca/gsc_minerals/gquerycache/snw/DP/dp597.html,,,,,,,,,,,
Montesinho-Portelo,,Portugal,,,,,,http://apps1.gdr.nrcan.gc.ca/gsc_minerals/gquerycache/snw/DP/dp589.html,,,,,,,,,,,
Panasqueira,,Portugal,292,,31,0.02,0.006,"Kelly and Rye, 1979, Econ Geol, v. 74, p. 1721-1822; Eckstand et al., 1995, Geol Can Ore Deps",,,,,,,,,,,
Ribeira,,Portugal,,,,,,http://apps1.gdr.nrcan.gc.ca/gsc_minerals/gquerycache/snw/DP/dp590.html,,,,,,,,,,,
Seixoso,,Portugal,,,,,,http://apps1.gdr.nrcan.gc.ca/gsc_minerals/gquerycache/snw/DP/dp584.html,,,,,,,,,,,
Vieiros,,Portugal,,,,,,http://apps1.gdr.nrcan.gc.ca/gsc_minerals/gquerycache/snw/DP/dp585.html,,,,,,,,,,,
Ainatvetkin,,Russia,30,Late Paleogene,,,0.01,USGS Bull 1697,,,,,,,,,,,
Alyaskitovoe,,Russia,,,,0.38,0.003,USGS Bull 1697,,,,,,,,,,,
Arsenyevskoe (Arsenyevka)  (Kavalerovo),Sikhote-Alin,Russia,60,,,,,"Seltmann et al., 2010, Australian Journal of Earth Sciences, v. 57, p. 655-706; USGS Bull 1697",,,,,,,,,,,
Bichinskoe,,Russia,55,,,,0.003,USGS Bull 1697,,,,,,,,,,,
Bolshoy Kanyon-Darpir,,Russia,155,Late Jurassic,,,0.0063,USGS Bull 1697,,,,,,,,,,,
Burgachan,,Russia,,,,,0.01,USGS Bull 1697,,,,,,,,,,,
Burgavli,,Russia,,,,,0.01,USGS Bull 1697,,,,,,,,,,,
Buta-Koppi,Sikhote-Alin,Russia,70,,,,,"Gonevchuk et al., 2010, Australian Jour Earth Sci, v. 57, p. 777-802",,,,,,,,,,,
Butugychag,,Russia,145,Late Jurassic-Early Cretaceous,,,0.01,USGS Bull 1697,,,,,,,,,,,
Chaantal,,Russia,,,,,0.005,USGS Bull 1697,,,,,,,,,,,
Churpun'ya,Yakutia,Russia,101,,,,,"Volkov et al., 2007, Doklady Earth Sciences, v. 416, p. 987-990",,,,,,,,,,,
Dalnetayozhnoe/Luzhkinsky,,Russia,,,,,0.003,USGS Bull 1697,,,,,,,,,,,
Deputatskoe,Yana-Kolyma,Russia,108,K Ar on stock,,1.15,,"Seltmann et al., 2010, Australian Journal of Earth Sciences, v. 57, p. 655-706; USGS Bull 1697",,,,,,,,,,,
Dioritovoe,,Russia,85,Late Cretaceous??,,,0.01,USGS Bull 1697,,,,,,,,,,,
Dneprov,,Russia,85,Upper Cretaceous,,,0.005,USGS Bull 1697,,,,,,,,,,,
Dusse-Alin,Sikhote-Alin,Russia,70,,,,,"Gonevchuk et al., 2010, Australian Jour Earth Sci, v. 57, p. 777-802",,,,,,,,,,,
Dzhalinda,Amur,Russia,99,,,0.01,,"Korostelev et al., 2009, Geology of Ore Deposits, v. 51, p. 305-316",,,,,,,,,,,
Dzhida,,Russia,,,11,0.43,0.047,"Eckstrand et al., 1995, Geol Can Ore Deps",,,,,,,,,,,
Egorlyk,,Russia,85,Upper Cretaceous,,,0.004,USGS Bull 1697,,,,,,,,,,,
Ekug,,Russia,85,Late Cretaceous,,,0.01,USGS Bull 1697,,,,,,,,,,,
Elmaun,,Russia,,,,,0.004,USGS Bull 1697,,,,,,,,,,,
Erikag,,Russia,134,,,,,USGS Bull 1697,,,,,,,,,,,
Eruttin,,Russia,85,Late Cretaceous,,,0.004,USGS Bull 1697,,,,,,,,,,,
Ezop,Sikhote-Alin,Russia,70,,,,,"Gonevchuk et al., 2010, Australian Jour Earth Sci, v. 57, p. 777-802",,,,,,,,,,,
Festivalnoe (Komsomolsk),Sikhote-Alin,Russia,73,70 to 75,,,0.01,USGS Bull 1697,,,,,,,,,,,
Furmanovo,Sikhote-Alin,Russia,70,,,,,"Gonevchuk et al., 2010, Australian Jour Earth Sci, v. 57, p. 777-802",,,,,,,,,,,
Galimoe,,Russia,120,Early Cretceous,,,0.003,USGS Bull 1697,,,,,,,,,,,
Ilin-Tas,,Russia,143,,,,0.15,USGS Bull 1697,,,,,,,,,,,
Imtandzha,,Russia,,,,,,USGS Bull 1697,,,,,,,,,,,
Ippatinskoe,,Russia,83,75 to 90,,,0.003,USGS Bull 1697,,,,,,,,,,,
Ircha,,Russia,85,Late Cretaceous,,,0.01,USGS Bull 1697,,,,,,,,,,,
Iul'tin (Ilutin),Chukotka,Russia,76.3,,,,,"Seltmann et al., 2010, Australian Journal of Earth Sciences, v. 57, p. 655-706; USGS Bull1697",,,,,,,,,,,
Kandychan,,Russia,,,,,0.002,USGS Bull 1697,,,,,,,,,,,
Khapcheranga,Transbailkalia,Russia,160,Middle Jurassic,,0.75,0.01,"Seltmann et al., 2010, Australian Journal of Earth Sciences, v. 57, p. 655-706",,,,,,,,,,,
Khingan-Olono,Sikhote-Alin,Russia,85,,,0.65,0.01,USGS Bull 1697,,,,,,,,,,,
Khoron,,Russia,83,,,,,USGS Bull 1697,,,,,,,,,,,
Khrustal,,Russia,30,30 to 27,,0.7,0.003,USGS Bull 1697,,,,,,,,,,,
Khunkhada,,Russia,134,,,,0.003,USGS Bull 1697,,,,,,,,,,,
Kukenei,,Russia,,,,,0.15,USGS Bull 1697,,,,,,,,,,,
Kupolnoye/Prognoz,,Russia,,,,,,"Anikina et al., 2009, SGZ Townsville",,,,,,,,,,,
Lazo,,Russia,,,,,0.135,USGS Bull 1697,,,,,,,,,,,
Loshadinayagriva,,Russia,80,75 to 85,,,0.003,USGS Bull 1697,,,,,,,,,,,
Lunnoe,,Russia,,,,,0.01,USGS Bull 1697,,,,,,,,,,,
Mangaseiskoye,,Russia,,,,,,"Anikina et al., 2009, SGZ Townsville",,,,,,,,,,,
Mramornoe,,Russia,100,Albian Cenomanian,,,0.01,USGS Bull 1697,,,,,,,,,,,
Nevskoe,,Russia,85,Upper Cretaceous,,,0.005,USGS Bull 1697,,,,,,,,,,,
Niman,Sikhote-Alin,Russia,70,,,,,"Gonevchuk et al., 2010, Australian Jour Earth Sci, v. 57, p. 777-802",,,,,,,,,,,
Nizhnee,,Russia,,,,,0.003,USGS Bull 1697,,,,,,,,,,,
Pavel-Chokhchurskoe,,Russia,120,Early Cretaceous,,,,USGS Bull 1697,,,,,,,,,,,
Perevalnoe (Komsomolsk),Sikhote-Alin,Russia,70,,,,,"Gonevchuk et al., 2010, Australian Jour Earth Sci, v. 57, p. 777-802",,,,,,,,,,,
"Pitkyaranta (Uksa, Lupikko)",,Russia,,,,,,"Ivashchenko et al., 2011, Doklady Earth Scie, v. 440, p. 1307-1311",,,,,,,,,,,
Polyarnoe,,Russia,,Cretaceous,,,,USGS Bull 1697,,,,,,,,,,,
Pravo-Urmiiskoe,Khabarovsk,Russia,80,75 to 85,,0.84,,"Seltmann et al., 2010, Australian Journal of Earth Sciences, v. 57, p. 655-706; USGS Bull1697",,,,,,,,,,,
Pravourmi (Badzhal),Sikhote-Alin,Russia,70,,,,,"Gonevchuk et al., 2010, Australian Jour Earth Sci, v. 57, p. 777-802",,,,,,,,,,,
Pridorozhnoe (Komsomolsk),Sikhote-Alin,Russia,70,,,,,"Gonevchuk et al., 2010, Australian Jour Earth Sci, v. 57, p. 777-802",,,,,,,,,,,
Pyrkakai,Chukotka,Russia,85,Upper Cretaceous??,,0.23,0.26,"Seltmann et al., 2010, Australian Journal of Earth Sciences, v. 57, p. 655-706",,,,,,,,,,,
Rexnikov,,Russia,60,Paleogene,,,0.005,USGS Bull 1697,,,,,,,,,,,
Rudnikovskoe,,Russia,,,,,0.003,USGS Bull 1697,,,,,,,,,,,
Silinka (Kavalerovo),Sikhote-Alin,Russia,70,,,,,"Gonevchuk et al., 2010, Australian Jour Earth Sci, v. 57, p. 777-802",,,,,,,,,,,
Smirnovskoe Luzhkinsky (Krasnorechenskaya),Sikhote-Alin,Russia,52,,,,,USGS Bull 1697,,,,,,,,,,,
Solkuchan,,Russia,135,Early Cretaceous,,,0.01,USGS Bull 1697,,,,,,,,,,,
Solnechnoe (Komsomolsk),Sikhote-Alin,Russia,77,75 to 80,,0.56,0.01,USGS Bull 1697,,,,,,,,,,,
Suvorov,,Russia,85,Late Cretaceous,,,0.003,USGS Bull 1697,,,,,,,,,,,
Svetloe,,Russia,80,Cretaceous,,,0.003,USGS Bull 1697,,,,,,,,,,,
Telekai,,Russia,85,Late Cretaceous,,,0.01,USGS Bull 1697,,,,,,,,,,,
Tigrets-Industriya,,Russia,85,Late Cretaceous,,,0.003,USGS Bull 1697,,,,,,,,,,,
Tigrinoe (Armu),Sikhote-Alin,Russia,73,,,,0.14,"Belyatsky et al., 1998, Anat; USGS Bull 1697",,,,,,,,,,,
Trood,,Russia,85,Late Cretaceous,,,0.005,USGS Bull 1697,,,,,,,,,,,
Valkumei,,Russia,85,Late Cretaceous,,,0.15,USGS Bull 1697,,,,,,,,,,,
Verkhnebidzhanskoe,,Russia,85,Late Cretaceous,,,0.005,USGS Bull 1697,,,,,,,,,,,
Verkhnezolotoe,,Russia,85,Late Cretaceous,,,0.005,USGS Bull 1697,,,,,,,,,,,
Vodorazdelnoye,,Russia,85,Late Cretaceous,,,0.005,USGS Bull 1697,,,,,,,,,,,
Voznesenka,Sikhote-Alin,Russia,70,,,,,"Gonevchuk et al., 2010, Australian Jour Earth Sci, v. 57, p. 777-802",,,,,,,,,,,
Vstrechnoe (Krasnorechenskaya),Sikhote-Alin,Russia,70,,,,,"Gonevchuk et al., 2010, Australian Jour Earth Sci, v. 57, p. 777-802",,,,,,,,,,,
Vysokogorskoe (Kavalerovo),Sikhote-Alin,Russia,,,,,,USGS Bull 1697,,,,,,,,,,,
Yantarnoe,,Russia,65,,,,0.005,USGS Bull 1697,,,,,,,,,,,
Yaroslavskoe,Primorye,Russia,408,,,0.52,0.01,USGS Bull 1697,,,,,,,,,,,
Yzhnoe Luzhkinsky (Krasnorechenskaya),Sikhote-Alin,Russia,85,,,,,USGS Bull 1697,,,,,,,,,,,
Zabytoe,,Russia,85,Late Cretaceous,,,,USGS Bull 1697,,,,,,,,,,,
Zimnee/Luzhkinsky,,Russia,50,,,0.59,0.005,USGS Bull 1697,,,,,,,,,,,
Zvezdnoe,,Russia,85,Late Cretaceous,,,0.005,USGS Bull 1697,,,,,,,,,,,
Hnilec,,Slovakia,263,,,,,"KohAot and Stein, 2005, Mineralogy and Petrology, v. 85, p. 117-129",,,,,,,,,,,
Wangpiri,,South Korea,,,,,,"http://apps1.gdr.nrcan.gc.ca/chameleon/widgets/Query/QueryResults.phtml?sid=4fcd33ec97e36&RADIUS=3&FEATURE_COUNT=5&include_empty=false&NAV_INPUT_COORDINATES=134,167",,,,,,,,,,,
Beatriz,,Spain,292,,,,,"Llorens and Moro, 2012, Min Mag, v 76, p 1-24",,,,,,,,,,,
Calabor,Zamora,Spain,,,0.65,0.0045,0.000,http://apps1.gdr.nrcan.gc.ca/gsc_minerals/gquerycache/snw/DP/dp814.html,,,,,,,,,,,
Dorinda,Zamora,Spain,,,1,0.007,0.000,http://apps1.gdr.nrcan.gc.ca/gsc_minerals/gquerycache/snw/DP/dp816.html,,,,,,,,,,,
El Cubito,Salamanca,Spain,,,,,,http://apps1.gdr.nrcan.gc.ca/gsc_minerals/gquerycache/snw/DP/dp817.html,,,,,,,,,,,
Golpejas-Bellita,Salamanca,Spain,,,1,0.001,0.000,http://apps1.gdr.nrcan.gc.ca/gsc_minerals/gquerycache/snw/DP/dp812.html,,,,,,,,,,,
Lagrosan,Caceres,Spain,,,,,,http://apps1.gdr.nrcan.gc.ca/gsc_minerals/gquerycache/snw/DP/dp821.html,,,,,,,,,,,
Laza ,Orense,Spain,,,17.04,0.000676,0.000,http://apps1.gdr.nrcan.gc.ca/gsc_minerals/gquerycache/snw/DP/dp822.html,,,,,,,,,,,
Navasfrias,,Spain,292,,,,,"Llorens and Moro, 2012, Min Mag, v 76, p 1-24",,,,,,,,,,,
Oropesa,Cordoba,Spain,,,,,,http://apps1.gdr.nrcan.gc.ca/gsc_minerals/gquerycache/snw/DP/dp825.html,,,,,,,,,,,
Penouta,Orense,Spain,,,,,,http://apps1.gdr.nrcan.gc.ca/gsc_minerals/gquerycache/snw/DP/dp826.html,,,,,,,,,,,
Santa Elisa,Zamora,Spain,,,5,0.0005,0.000,http://apps1.gdr.nrcan.gc.ca/gsc_minerals/gquerycache/snw/DP/dp830.html,,,,,,,,,,,
Bang I Tum,,Thailand,56,,,,0.00025,"Schwartz et al., 1995, Earth Sci Reviews, v. 38, p. 95-293",,,,,,,,,,,
Bang Phra,,Thailand,73,,,,0.00025,"Schwartz et al., 1995, Earth Sci Reviews, v. 38, p. 95-293",,,,,,,,,,,
Chone,,Thailand,73,,,,0.00025,"Schwartz et al., 1995, Earth Sci Reviews, v. 38, p. 95-293",,,,,,,,,,,
Doi Mok,,Thailand,223,,,,0.01,"Schwartz et al., 1995, Earth Sci Reviews, v. 38, p. 95-293",,,,,,,,,,,
Doi Ngoem,,Thailand,207,,,,0.01,"Schwartz et al., 1995, Earth Sci Reviews, v. 38, p. 95-293",,,,,,,,,,,
Haad Som Pan,,Thailand,73,,,,0.01,"Schwartz et al., 1995, Earth Sci Reviews, v. 38, p. 95-293",,,,,,,,,,,
Hui Luang,,Thailand,60,,,,0.003,"Schwartz et al., 1995, Earth Sci Reviews, v. 38, p. 95-293",,,,,,,,,,,
Juti,,Thailand,59,,,,0.00025,"Schwartz et al., 1995, Earth Sci Reviews, v. 38, p. 95-293",,,,,,,,,,,
Kao Kaew,,Thailand,185,,,,0.00025,"Schwartz et al., 1995, Earth Sci Reviews, v. 38, p. 95-293",,,,,,,,,,,
Khao Chai,,Thailand,77,,,,0.00025,"Schwartz et al., 1995, Earth Sci Reviews, v. 38, p. 95-293",,,,,,,,,,,
Khao Phanom,,Thailand,43,,,,0.00025,"Schwartz et al., 1995, Earth Sci Reviews, v. 38, p. 95-293",,,,,,,,,,,
Khao Ron,,Thailand,197,,,,0.00025,"Schwartz et al., 1995, Earth Sci Reviews, v. 38, p. 95-293",,,,,,,,,,,
Khao Soon,,Thailand,59,,,,0.008,"Schwartz et al., 1995, Earth Sci Reviews, v. 38, p. 95-293",,,,,,,,,,,
Ko Sa Ba,,Thailand,82,,,,0.003,"Schwartz et al., 1995, Earth Sci Reviews, v. 38, p. 95-293",,,,,,,,,,,
Laem Mai Kaen,,Thailand,202,,,,0.00025,"Schwartz et al., 1995, Earth Sci Reviews, v. 38, p. 95-293",,,,,,,,,,,
Lamboo,,Thailand,82,,,,0.01,"Schwartz et al., 1995, Earth Sci Reviews, v. 38, p. 95-293",,,,,,,,,,,
Mae Lama,,Thailand,60,,,,0.003,"Schwartz et al., 1995, Earth Sci Reviews, v. 38, p. 95-293",,,,,,,,,,,
Mae Surie,,Thailand,46,,,,0.00025,"Schwartz et al., 1995, Earth Sci Reviews, v. 38, p. 95-293",,,,,,,,,,,
Mae Toranee,,Thailand,72,,,,0.00025,"Schwartz et al., 1995, Earth Sci Reviews, v. 38, p. 95-293",,,,,,,,,,,
Mai-Liang-Mai Mong,,Thailand,207,,,,0.003,"Schwartz et al., 1995, Earth Sci Reviews, v. 38, p. 95-293",,,,,,,,,,,
Ngan Thawee,,Thailand,56,,,,0.00025,"Schwartz et al., 1995, Earth Sci Reviews, v. 38, p. 95-293",,,,,,,,,,,
Nok Hook,,Thailand,59,,,,0.003,"Schwartz et al., 1995, Earth Sci Reviews, v. 38, p. 95-293",,,,,,,,,,,
Nong Sua,,Thailand,64,,,,0.00025,"Schwartz et al., 1995, Earth Sci Reviews, v. 38, p. 95-293",,,,,,,,,,,
Pad Roi,,Thailand,181,,,,0.003,"Schwartz et al., 1995, Earth Sci Reviews, v. 38, p. 95-293",,,,,,,,,,,
Phu Pak Nam,,Thailand,59,,,,0.003,"Schwartz et al., 1995, Earth Sci Reviews, v. 38, p. 95-293",,,,,,,,,,,
Pinyok,,Thailand,82,,,,0.01,"Schwartz et al., 1995, Earth Sci Reviews, v. 38, p. 95-293",,,,,,,,,,,
Polthavi,,Thailand,181,,,,0.003,"Schwartz et al., 1995, Earth Sci Reviews, v. 38, p. 95-293",,,,,,,,,,,
Reung Kiet,,Thailand,57,,,,0.00025,"Schwartz et al., 1995, Earth Sci Reviews, v. 38, p. 95-293",,,,,,,,,,,
Rong Lek,,Thailand,59,,,,0.003,"Schwartz et al., 1995, Earth Sci Reviews, v. 38, p. 95-293",,,,,,,,,,,
Sahakit,,Thailand,181,,,,0.003,"Schwartz et al., 1995, Earth Sci Reviews, v. 38, p. 95-293",,,,,,,,,,,
Samoeng,,Thailand,207,,,,0.003,"Schwartz et al., 1995, Earth Sci Reviews, v. 38, p. 95-293",,,,,,,,,,,
Sathorn,,Thailand,59,,,,0.003,"Schwartz et al., 1995, Earth Sci Reviews, v. 38, p. 95-293",,,,,,,,,,,
Sn Toranee,,Thailand,39,,,,0.00025,"Schwartz et al., 1995, Earth Sci Reviews, v. 38, p. 95-293",,,,,,,,,,,
Sompong,,Thailand,59,,,,0.003,"Schwartz et al., 1995, Earth Sci Reviews, v. 38, p. 95-293",,,,,,,,,,,
Takua Pa,Phuket-Phangna,Thailand,78,,large,,0.015,"Lehmann, 1990, Metallogeny of tin, p. 190",,,,,,,,,,,
Tara,,Thailand,223,,,,0.01,"Schwartz et al., 1995, Earth Sci Reviews, v. 38, p. 95-293",,,,,,,,,,,
Thung Poe-Thung Kamin,,Thailand,82,,,,0.003,"Schwartz et al., 1995, Earth Sci Reviews, v. 38, p. 95-293",,,,,,,,,,,
Vistae,,Thailand,72,,,,0.00025,"Schwartz et al., 1995, Earth Sci Reviews, v. 38, p. 95-293",,,,,,,,,,,
Wang Pha,,Thailand,187,,,,0.00025,"Schwartz et al., 1995, Earth Sci Reviews, v. 38, p. 95-293",,,,,,,,,,,
Yod Nam,,Thailand,59,,,,0.003,"Schwartz et al., 1995, Earth Sci Reviews, v. 38, p. 95-293",,,,,,,,,,,
Pilok-Hermyingyi,western,Thailand-Burma/Myanmar,59,,,,0.003,"Lehmann, 1990, Metallogeny of tin, p. 190",,,,,,,,,,,
Kestel,,Turkey,,,,,,check reference,,,,,,,,,,,
Bismark Creek,Alaska,USA,70,,0.5,0.137,0.001,USGS Prof Paper 1697,,,,,,,,,,,
"Boulder Ck, Ohio Ck, Coal Ck, Treasure Ck",Sikhote-Alin,USA,57,,,,,USGS Prof Paper 1697,,,,,,,,,,,
Buck Creek-Potato Mtn,Alaska,USA,,,,,,Geol Survey of Canada,,,,,,,,,,,
Cape Creek,Alaska,USA,,,,,,Geol Survey of Canada,,,,,,,,,,,
Cape Mtn,Alaska,USA,78.8,,,,,USGS Prof Paper 1697,,,,,,,,,,,
Coal Creek,Alaska,USA,55,,4.54,0.28,,USGS Prof Paper 1697; http://apps1.gdr.nrcan.gc.ca/gsc_minerals/gquerycache/snw/DP/dp955.html,,,,,,,,,,,
Groundhog Basin,Alaska,USA,20,Miocene,,,,USGS Prof Paper 1697,,,,,,,,,,,
Irish Creek,Virginia,USA,650,,,,,"Hudson and Dallmeyer, 1982, Econ Geol, v. 77, p. 189-192",,,,,,,,,,,
JC,Alaska,USA,100,middle Cretaceous,1.25,0.54,0.007,USGS Prof Paper 1697,,,,,,,,,,,
Kougarak,Alaska,USA,,,0.15,1,0.002,http://apps1.gdr.nrcan.gc.ca/gsc_minerals/gquerycache/snw/DP/dp961.html,,,,,,,,,,,
Lime Peak,Alaska,USA,61,57 to 66,,,,USGS Prof Paper 1697,,,,,,,,,,,
Lost River,Alaska,USA,80,,33,0.27,0.089,"Premoli, 1985, Natural Resources Forum, v. 9, p. 107-117; USGS Bull 1697",,,,,,,,,,,
Sleitat Mtn,Alaska,USA,56.8,,25.9,0.3,0.078,"USGS Prof Paper 1697; Burleigh, 1991, USGS Open File 35-91; http://apps1.gdr.nrcan.gc.ca/gsc_minerals/gquerycache/snw/DP/dp972.html",,,,,,,,,,,
Win,Alaska,USA,70,,1.94,0.59,0.011,USGS Prof Paper 1697,,,,,,,,,,,
Kha ,,Vietnam,,,,,0.014,"Vu et al., 1980, Geologiya Rudnykh Mestorozhdeniy, v. 22, p. 90-03",,,,,,,,,,,
Pia Oac,,Vietnam,,,,,0.0015,http://apps1.gdr.nrcan.gc.ca/gsc_minerals/gquerycache/snw/DP/dp991.html,,,,,,,,,,,
